# Supplementary material for: A colorimetric probe to determine Pb2+ using functionalized silver nanoparticles
Source: Royal Society of Chemistry journal article supplement (doi:10.1039/c5an01601k), 2015-01-01

### Supplementary Figure Captions

**Figure S1.** (A) The color changes of MTT–AgNP solutions at pH 2, 3, 4, 5, 6, 7, 8, 9, 10, 11 and 12 with 3 ppm  $\text{Pb}^{2+}$  ion for 30 min incubation time. (B) UV–vis absorption spectra of the MTT-stabilized AgNPs upon addition of 3 ppm  $\text{Pb}^{2+}$  ion at various pH values for 30 min incubation time. (C) The corresponding absorbance ratios ( $A_{625}/A_{395}$ ) of  $\text{Pb}^{2+}$ –MTT–AgNPs solution at the various pH values.

**Figure S2.** (A) Visual color change in AgNPs solutions with 0.4 ppm  $\text{Pb}^{2+}$  ion concentration upon addition of various concentrations of MTT. (B) UV–vis absorption spectra of AgNPs solutions with 0.4 ppm  $\text{Pb}^{2+}$  ion concentration upon addition of various concentrations of MTT.

Fig. S1

(A)

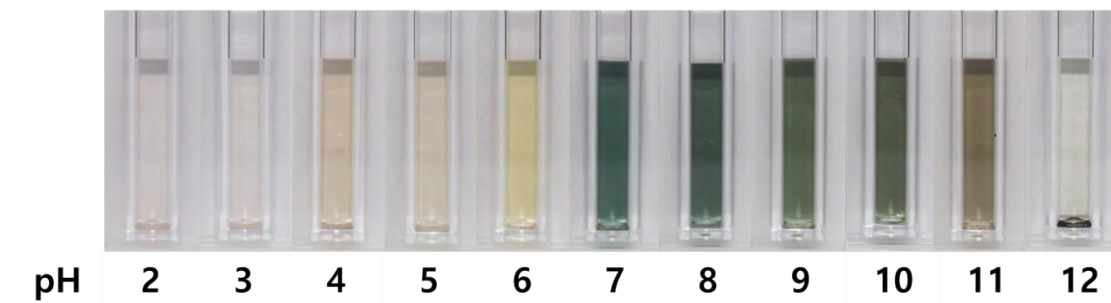

(B)

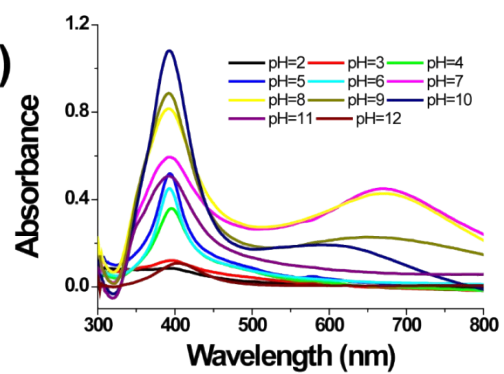

(C)

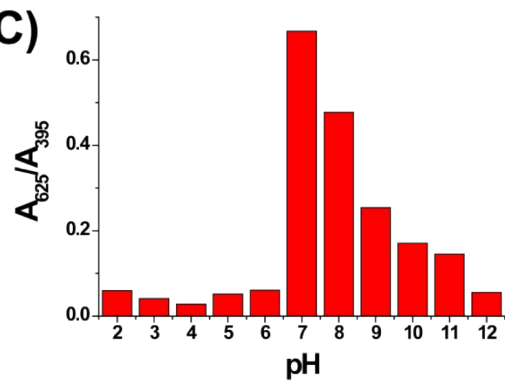

Fig. S2.

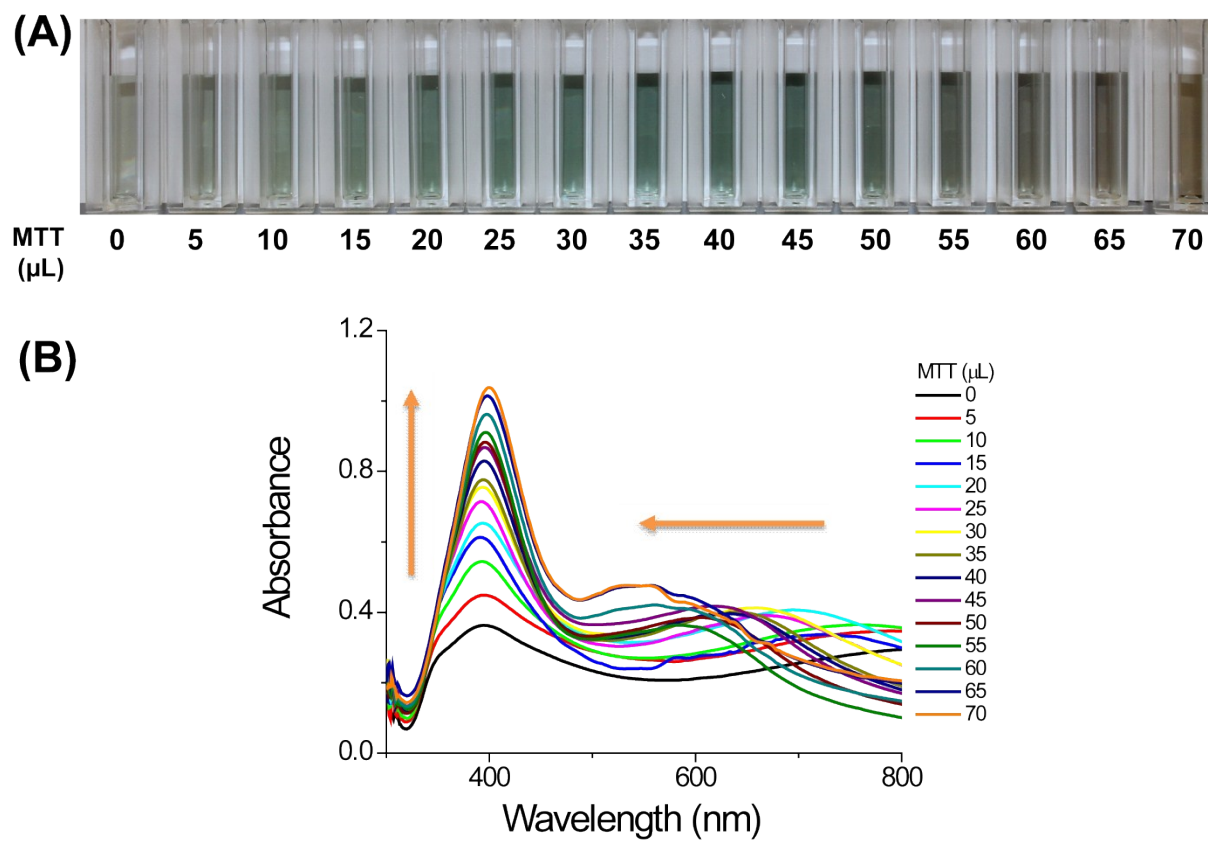

Supplement: c5an01601k1.pdf [file c5an01601k1.pdf]
